# Supplementary material for: PRG3 and PRG5 C-Termini: Important Players in Early Neuronal Differentiation
Source: MDPI journal article supplement (doi:10.3390/ijms232113007), 2022-10-27
Supplement: s1 [file s1]

## Supplementary Figure S1

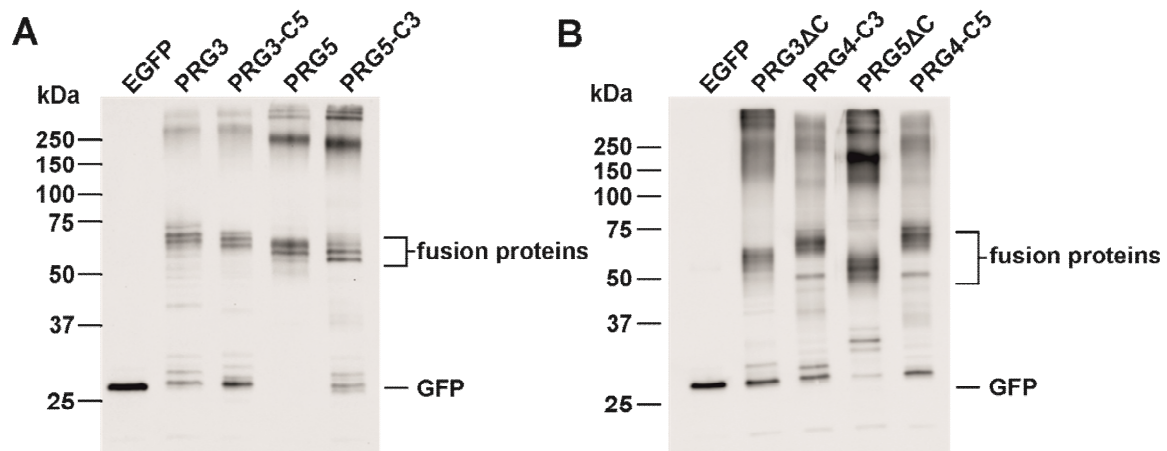

**Supplementary Figure S1.** Western blot analysis of fusion protein expression. The immunoblots were probed with an anti-GFP monoclonal antibody. (A) Examination of recombinant purified protein lysates of HEK293H cells expressing pEGFP-N1 alone (empty vector, control) or PRG3-, PRG3-C5-, PRG5- or PRG5-C3- EGFP fusion proteins (see **Table 5**) in immunoblot (IB) confirmed that the plasmids used in this study were sufficiently expressed. Double bands at ~63 kDa (PRG3 and PRG3-C5) and ~62.9 kDa (PRG5 and PRG5-C3) exhibited anti-GFP signal; a single band at 26.9 kDa represented GFP alone. The anti-GFP antibody also detects bands above 150 kDa in case of PRG5 and PRG5-C3 (B) Analysis of recombinant purified protein lysates expressing PRG3ΔC-, PRG4-C3-, PRG5ΔC- and PRG4-C5 (see **Table 5**) in immunoblot also confirmed sufficient expression. The deletion constructs PRG3ΔC and PRG5ΔC showed bands at ~57 kDa. PRG4-C3 and PRG4-C5 were found as double bands at ~63 kDa. Likewise, a band above 150 kDa is shown for PRG5ΔC. As a control, no band can be seen at ~63 kDa or ~57 kDa in EGFP transfected control cells. These results indicate expression of all plasmids in HEK293H cells.

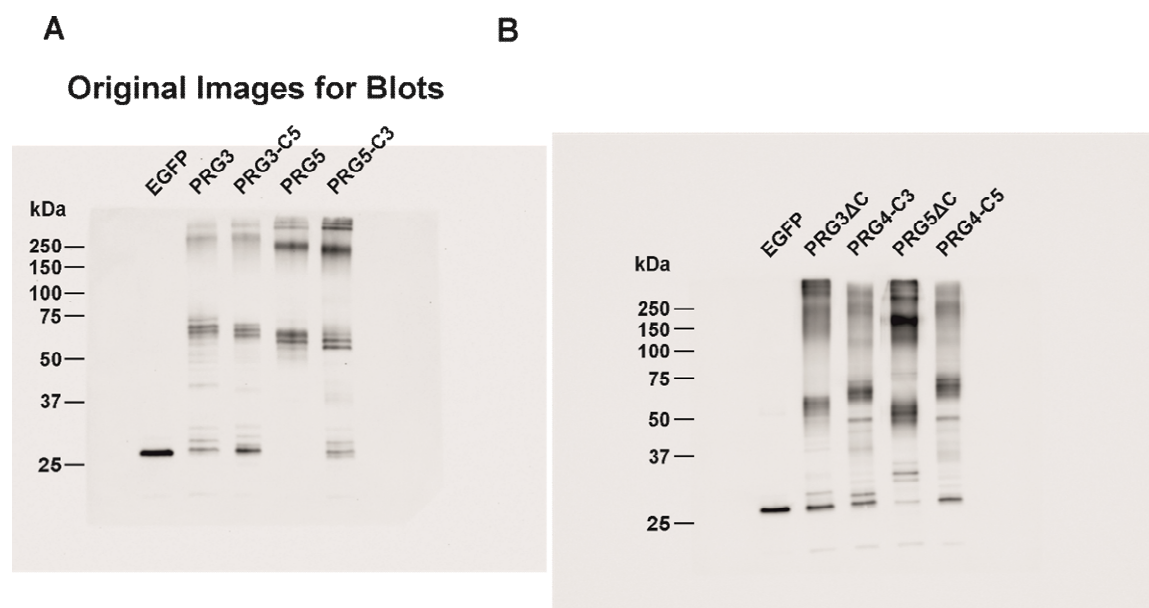

# Supplementary Figure S2

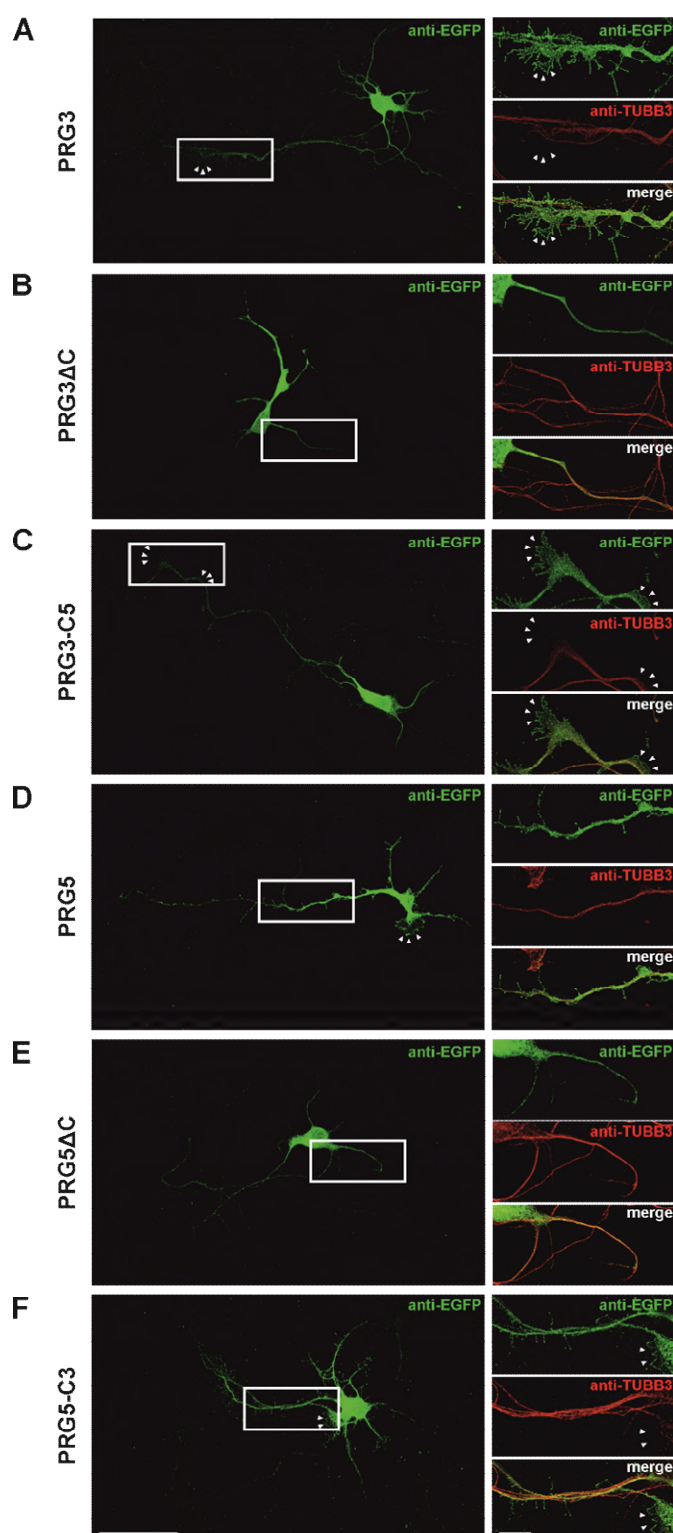

**Supplementary Figure S2.** Confocal stacks of representative hippocampal neurons with immunocytochemistry of the respective plasmids (PRG3, PRG3ΔC, PRG3-C5, PRG5, PRG5ΔC, PRG5-C3) stained for GFP to visualize the morphology of the cell or tubulin are shown here. Left panel: an overview of the neurons used for the higher magnification in Figure 3A, 4A is shown here. White rectangles indicate magnified areas shown in the right panels. Arrowheads denote areas showing membrane localization. Scale bars represent 50 μm (left panel) and 10 μm (right panel).

# Supplementary Figure S3

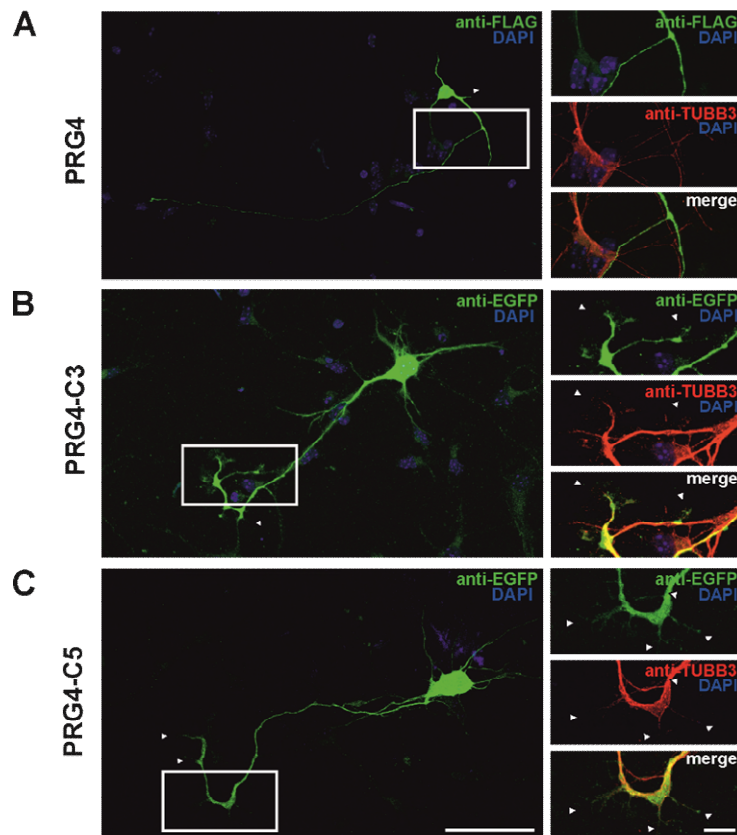

**Supplementary Figure S3.** Confocal stacks of representative hippocampal neurons with immunocytochemistry of the respective plasmids (PRG4, PRG4-C3, PRG4-C5) and stained for FLAG (PRG4) or GFP (PRG4-C3, PRG4-C5) to visualize the morphology of the cell or tubulin are shown here. Left panel: an overview of the neurons used for the higher magnification in Figure 6A, 7A is shown here. White rectangles indicate magnified areas shown in the right panels. Arrowheads denote areas showing membrane localization. Scale bars represent 50 μm (left panel) and 10 μm (right panel).

## Supplemental material S1

**Table S1: Median/IQR** of data presented in **Fig. 3B-G** from N=3 independent experiments

| Condition                                                                        | PRG3<br>(n=40) | PRG3 $\Delta$ C<br>(n=41) | PRG3-C5<br>(n=38) |
|----------------------------------------------------------------------------------|----------------|---------------------------|-------------------|
|                                                                                  | Median/IQR     |                           |                   |
| Number of neurites (>10 $\mu$ m) per neuron                                      | 15/8           | 9/4                       | 14/7              |
| Number of major neurite length per neuron                                        | 245.6/132,1    | 101.7/96,4                | 213.8/152,4       |
| Number of branching points per neuron                                            | 9.0/9.8        | 3.0/4.5                   | 7.0/6.0           |
| Number of short protrusions (0.2 - <2 $\mu$ m) per 100 $\mu$ m length per neuron | 6.7/3.8        | 1.3/2.6                   | 5.9/4.6           |
| Number of medium protrusions (2 - <5 $\mu$ m) per 100 $\mu$ m length per neuron  | 4.1/1.9        | 0.8/1.2                   | 3.3/1.5           |
| Number of long protrusions (5 - <10 $\mu$ m) per 100 $\mu$ m length per neuron   | 1.2/0.8        | 0.6/0.6                   | 1.0/1.0           |

**Table S2: Median/IQR** of data presented in **Fig. 4B-G** from N=3 independent experiments

| Condition                                                                        | PRG5<br>(n=44) | PRG5 $\Delta$ C<br>(n=37) | PRG5-C3<br>(n=41) |
|----------------------------------------------------------------------------------|----------------|---------------------------|-------------------|
|                                                                                  | Median/IQR     |                           |                   |
| Number of neurites (>10 $\mu$ m) per neuron                                      | 12.0/7.0       | 12.0/5.0                  | 11.0/7.0          |
| Number of major neurite length per neuron                                        | 171.5/121.1    | 139.2/89.8                | 194.0/152.3       |
| Number of branching points per neuron                                            | 6.0/4.8        | 4.0/4.0                   | 5.0/5.0           |
| Number of short protrusions (0.2 - <2 $\mu$ m) per 100 $\mu$ m length per neuron | 8.4/4.2        | 3.2/2.3                   | 7.5/3.9           |
| Number of medium protrusions (2 - <5 $\mu$ m) per 100 $\mu$ m length per neuron  | 4.1/2.5        | 1.5/1.4                   | 3.1/1.9           |
| Number of long protrusions (5 - <10 $\mu$ m) per 100 $\mu$ m length per neuron   | 1.4/1.3        | 0.7/0.6                   | 1.5/0.9           |

**Table S3: Median/IQR** of data presented in **Fig. 6B-G** from N=3 independent experiments

| Condition                                                                        | PRG4<br>(n=30) | PRG3<br>(n=30) | PRG4-C3<br>(n=30) |
|----------------------------------------------------------------------------------|----------------|----------------|-------------------|
|                                                                                  | Median/IQR     |                |                   |
| Number of neurites (>10 $\mu$ m) per neuron                                      | 7.0/4.0        | 10.0/9.0       | 9.0/6.3           |
| Number of major neurite length per neuron                                        | 114.7/114.7    | 117.3/116.5    | 169.0/155.2       |
| Number of branching points per neuron                                            | 2.5/3.3        | 3.5/5.3        | 3.0/4.8           |
| Number of short protrusions (0.2 - <2 $\mu$ m) per 100 $\mu$ m length per neuron | 0.0/0.0        | 0.1/0.9        | 0.0/0.5           |
| Number of medium protrusions (2 - <5 $\mu$ m) per 100 $\mu$ m length per neuron  | 0.0/0.5        | 0.9/2.3        | 0.0/1.1           |
| Number of long protrusions (5 - <10 $\mu$ m) per 100 $\mu$ m length per neuron   | 0.3/0.5        | 0.9/1.5        | 0.2/1.0           |

**Table S4: Median/IQR** of data presented in Fig. 7B-G from N=3 independent experiments

| Condition                                                             | PRG4<br>(n=30) | PRG5<br>(n=30) | PRG4-C5<br>(n=30) |
|-----------------------------------------------------------------------|----------------|----------------|-------------------|
|                                                                       | Median/IQR     |                |                   |
| Number of neurites (>10 µm) per neuron                                | 7.0/4.0        | 14.0/7.8       | 10.0/7.8          |
| Number of major neurite length per neuron                             | 114.7/114.7    | 154.0/124.9    | 179.3/180.6       |
| Number of branching points per neuron                                 | 2.5/3.3        | 7.5/5.8        | 3.0/5.0           |
| Number of short protrusions (0.2 -<2 µm) per 100 µm length per neuron | 0.0/0.0        | 2.7/2.4        | 0.3/2.5           |
| Number of medium protrusions (2 -<5 µm) per 100 µm length per neuron  | 0.0/0.5        | 3.1/3.0        | 0.62/1.8          |
| Number of long protrusions (5 -<10 µm) per 100 µm length per neuron   | 0.3/0.5        | 1.5/1.1        | 0.3/0.8           |

**Table S5: Summary of oligonucleotides used for PCR and DNA sequencing**

| Denotation            | Sequence                                            | Application                      | NCBI            |
|-----------------------|-----------------------------------------------------|----------------------------------|-----------------|
| mPRG3ΔC-N1-pEGFP fwd  | 5' – GCT ACC GGA CTC AGA TCTCGA GAT G – 3'          | Cloning of mPRG3ΔC into pEGFP-N1 | NM_1787 56.4    |
| mPRG3ΔCpEGFP-N1 rev   | 5' – AAG GAT CCG CAT GAA CCA CAC ACA TTC C – 3'     | Cloning of mPRG3ΔC into pEGFP-N1 | NM_1787 56.4    |
| rPRG5ΔC- N1-pEGFP fwd | 5' – GAT CTC GAG CTC AAG CTTCGA ATT CGC C – 3'      | Cloning of rPRG5ΔC into pEGFP-N1 | NM_0011 07720.1 |
| rPRG5ΔC-pEGFP-N1 rev  | 5' – AAG GAT CCG CGA AGT TAT TTA CCA CGC ATA C – 3' | Cloning of rPRG5ΔC into pEGFP-N1 | NM_0011 07720.1 |
| Fwd-pFlagPRG4         | 5'-GAC CTC GAG AAG CTT ATG GCT-3'                   | Cloning of pEGFP-N1-mPRG4ΔC-C3   | NP_001277228.1  |
| Rev-pFlagPRG4         | 5'-CAC TGG AGT GGC AAC TTC CA-3'                    | Cloning of pEGFP-N1-mPRG4ΔC-C3   | NP_001277228.1  |
| pEGFP-N1 for          | 5'– GTC GTA ACA ACT CCG CCC – 3'                    | Sequencing primer                | U55762.1        |
| pEGFP-N1 rev          | 5'– GTC CAG CTC GAC CAG GAT G – 3'                  | Sequencing primer                | U55762.1        |

**Table S6: Primary antibodies and concentrations used for immunocytochemistry and western blot experiments**

| Antibody                        | Dilution for Immunocytochemistry | Dilution for Western Blot | Source                                             | Identifier                     |
|---------------------------------|----------------------------------|---------------------------|----------------------------------------------------|--------------------------------|
| Anti-GFP (JL-8)                 | 1:1000                           | 1:2500                    | Clontech/Takara Holdings Shimogyo-ku, Kyoto, Japan | Cat#632380<br>RRID:AB_10013427 |
| Anti-FLAG (HM-2)                | 1:1000                           | -                         | Sigma-Aldrich Chemie, Steinheim, Germany           | Cat#M4403<br>RRID:AB_477193    |
| Anti-β-III Tubulin Tuj1 (TUBB3) | 1:1000                           | -                         | Merck Millipore Billerica, Massachusetts, USA      | Cat#AB9354<br>RRID:AB_570918   |

**Table S7: Secondary antibodies/fluorescent stains and concentrations used for immunocytochemistry and western blot experiments**

| Antibody/fluorescent stain            | Dilution for Immunocytochemistry | Dilution for Western Blot | Source                                     | Identifier   |
|---------------------------------------|----------------------------------|---------------------------|--------------------------------------------|--------------|
| Goat-anti-mouse Alexa Fluor 488       | 1:1000                           | -                         | Thermo Fisher Scientific, Waltham, MA, USA | Cat#A11001   |
| Goat-anti-chicken IgY Alexa Fluor 568 | 1:1500                           | -                         | Thermo Fisher Scientific                   | Cat#A11077   |
| Rabbit-anti-chicken TRITC             | 1:400                            | -                         | Sigma-Aldrich Chemie                       | Cat#T6903    |
| Phalloidin-iFluor 555                 | 1:1000                           | -                         | Abcam, Cambridge, UK                       | Cat#ab176756 |
| DAPI (1 mg/ml)                        | 1:1000/1:2000                    | -                         | Sigma-Aldrich Chemie                       | Cat#D9542    |
| Sheep-anti-Mouse IgG HRP              | -                                | 1:10000                   | GE Healthcare, Solingen, Germany           | Cat#NA931    |
